# Supplementary material
Source: PubMed Central journal article supplement (PMC9667926)
Supplement: NIHMS1840117-supplement-321384_Major_Resources_Table.pdf [file NIHMS1840117-supplement-321384_Major_Resources_Table.pdf]

## Major Resources Table

In order to allow validation and replication of experiments, all essential research materials listed in the Methods should be included in the Major Resources Table below. Authors are encouraged to use public repositories for protocols, data, code, and other materials and provide persistent identifiers and/or links to repositories when available. Authors may add or delete rows as needed.

### Animals (in vivo studies)

| Species                | Vendor or Source           | Background Strain | Sex | Persistent ID / URL                                                                                                                                                                         |
|------------------------|----------------------------|-------------------|-----|---------------------------------------------------------------------------------------------------------------------------------------------------------------------------------------------|
| SAS Sprague Dawley Rat | Charles River Laboratories | Strain code 400   | M   | <a href="https://www.criver.com/products-services/find-model/sas-sprague-dawley-rat?region=3611">https://www.criver.com/products-services/find-model/sas-sprague-dawley-rat?region=3611</a> |

### Genetically Modified Animals

|                 | Species | Vendor or Source | Background Strain | Other Information | Persistent ID / URL |
|-----------------|---------|------------------|-------------------|-------------------|---------------------|
| Parent - Male   |         |                  |                   |                   |                     |
| Parent - Female |         |                  |                   |                   |                     |

### Antibodies

| Target antigen | Vendor or Source | Catalog #  | Working concentration | Lot # (preferred but not required) | Persistent ID / URL                                                                                                                                                                                           |
|----------------|------------------|------------|-----------------------|------------------------------------|---------------------------------------------------------------------------------------------------------------------------------------------------------------------------------------------------------------|
| MPO            | ThermoFisher     | PA5-16672  | 1:100                 |                                    | <a href="https://www.thermofisher.com/antibody/product/Myeloperoxidase-Antibody-Polyclonal/PA5-16672">https://www.thermofisher.com/antibody/product/Myeloperoxidase-Antibody-Polyclonal/PA5-16672</a>         |
| $\alpha$ -SA   | Abcam            | ab9465     | 1:100                 |                                    | <a href="https://www.abcam.com/sarcomeric-alpha-actinin-antibody-ea-53-ab9465.html">https://www.abcam.com/sarcomeric-alpha-actinin-antibody-ea-53-ab9465.html</a>                                             |
| CD3            | Abcam            | ab16669    | 1:100                 |                                    | <a href="https://www.abcam.com/cd3-antibody-sp7-ab16669.html">https://www.abcam.com/cd3-antibody-sp7-ab16669.html</a>                                                                                         |
| CD11c          | ThermoFisher     | PA5-90208  | 1:100                 |                                    | <a href="https://www.thermofisher.com/antibody/product/CD11c-Antibody-Polyclonal/PA5-90208">https://www.thermofisher.com/antibody/product/CD11c-Antibody-Polyclonal/PA5-90208</a>                             |
| CD11b          | Abcam            | ab52478    | 1:200                 |                                    | <a href="https://www.abcam.com/cd11b-antibody-ep1345y-c-terminal-ab52478.html">https://www.abcam.com/cd11b-antibody-ep1345y-c-terminal-ab52478.html</a>                                                       |
| SOCS3          | Abcam            | ab16030    | 1:200                 |                                    | <a href="https://www.abcam.com/socs3-antibody-ab16030.html">https://www.abcam.com/socs3-antibody-ab16030.html</a>                                                                                             |
| CD206          | Abcam            | ab64693    | 1:200                 |                                    | <a href="https://www.abcam.com/mannose-receptor-antibody-ab64693.html">https://www.abcam.com/mannose-receptor-antibody-ab64693.html</a>                                                                       |
| Ki67           | ThermoFisher     | 11-5698-82 | 1:100                 |                                    | <a href="https://www.thermofisher.com/antibody/product/Ki-67-Antibody-clone-SolA15-Monoclonal/11-5698-82">https://www.thermofisher.com/antibody/product/Ki-67-Antibody-clone-SolA15-Monoclonal/11-5698-82</a> |
| MHC-II         | Abcam            | ab55152    | 1:200                 |                                    | <a href="https://www.abcam.com/mhc-class-ii-antibody-6c6-ab55152.html">https://www.abcam.com/mhc-class-ii-antibody-6c6-ab55152.html</a>                                                                       |
| CD45           | Abcam            | ab10558    | 1:100                 |                                    | <a href="https://www.abcam.com/cd45-antibody-ab10558.html">https://www.abcam.com/cd45-antibody-ab10558.html</a>                                                                                               |
| CD4            | Abcam            | ab237722   | 1:100                 |                                    | <a href="https://www.abcam.com/cd4-antibody-cal4-ab237722.html">https://www.abcam.com/cd4-antibody-cal4-ab237722.html</a>                                                                                     |
| Foxp3          | ThermoFisher     | 53-4776-42 | 1:100                 |                                    | <a href="https://www.thermofisher.com/antibody/product/FOXP3-Antibody-clone-PCH101-Monoclonal/53-4776-42">https://www.thermofisher.com/antibody/product/FOXP3-Antibody-clone-PCH101-Monoclonal/53-4776-42</a> |

|                |                           |             |                         |  |                                                                                                                                                                                                                                                                                                                                   |
|----------------|---------------------------|-------------|-------------------------|--|-----------------------------------------------------------------------------------------------------------------------------------------------------------------------------------------------------------------------------------------------------------------------------------------------------------------------------------|
| CD31           | Abcam                     | ab28364     | 1:50                    |  | <a href="https://www.abcam.com/cd31-antibody-ab28364.html">https://www.abcam.com/cd31-antibody-ab28364.html</a>                                                                                                                                                                                                                   |
| $\alpha$ -SMA  | Abcam                     | ab32575     | 1:200                   |  | <a href="https://www.abcam.com/products/primary-antibodies/alpha-smooth-muscle-actin-acetyl-e3--actg2-acetyl-e3-antibody-e184-ab32575.html">https://www.abcam.com/products/primary-antibodies/alpha-smooth-muscle-actin-acetyl-e3--actg2-acetyl-e3-antibody-e184-ab32575.html</a>                                                 |
| PP2A           | Abcam                     | ab32065     | 1:1000(WB)              |  | <a href="https://www.abcam.com/pp2a-alpha--beta-antibody-ye351-ab32065.html">https://www.abcam.com/pp2a-alpha--beta-antibody-ye351-ab32065.html</a>                                                                                                                                                                               |
| Foxo3-p253     | Abcam                     | ab47285     | 1:100(IF);<br>1:500(WB) |  | <a href="https://www.abcam.com/foxo3a-phospho-s253-antibody-ab47285.html">https://www.abcam.com/foxo3a-phospho-s253-antibody-ab47285.html</a>                                                                                                                                                                                     |
| Foxo3          | Abcam                     | ab70315     | 1:100(IF);<br>1:500(WB) |  | <a href="https://www.abcam.com/foxo3a-antibody-ab70315.html">https://www.abcam.com/foxo3a-antibody-ab70315.html</a>                                                                                                                                                                                                               |
| p-Akt          | Cell signaling technology | 4060S       | 1:1000(WB)              |  | <a href="https://www.cellsignal.com/products/primary-antibodies/phospho-akt-ser473-d9e-xp-rabbit-mab/4060">https://www.cellsignal.com/products/primary-antibodies/phospho-akt-ser473-d9e-xp-rabbit-mab/4060</a>                                                                                                                   |
| IL-17a         | Invitrogen                | 11-7177-81  | 1:100                   |  | <a href="https://www.thermofisher.com/antibody/product/IL-17A-Antibody-clone-eBio17B7-Monoclonal/11-7177-81">https://www.thermofisher.com/antibody/product/IL-17A-Antibody-clone-eBio17B7-Monoclonal/11-7177-81</a>                                                                                                               |
| IFN-gamma      | BD Biosciences            | 559498      | 1:100                   |  | <a href="https://wwwbdbiosciences.com/en-us/products/reagents/flow-cytometry-reagents/research-reagents/single-color-antibodies-ruo/fitc-mouse-anti-rat-ifn.559498">https://wwwbdbiosciences.com/en-us/products/reagents/flow-cytometry-reagents/research-reagents/single-color-antibodies-ruo/fitc-mouse-anti-rat-ifn.559498</a> |
| IL-10          | BD Biosciences            | 562156      | 1:100                   |  | <a href="https://wwwbdbiosciences.com/en-us/search-results?searchKey=562156">https://wwwbdbiosciences.com/en-us/search-results?searchKey=562156</a>                                                                                                                                                                               |
| actin          | ThermoFisher              | MA5-11869   | 1:1000(WB)              |  | <a href="https://www.thermofisher.com/antibody/product/Actin-Antibody-clone-ACTN05-C4-Monoclonal/MA5-11869">https://www.thermofisher.com/antibody/product/Actin-Antibody-clone-ACTN05-C4-Monoclonal/MA5-11869</a>                                                                                                                 |
| IL-34 Antibody | R&D systems               | AF5159      | Neutralizing            |  | <a href="https://www.rndsystems.com/products/mouse-il-34-antibody_af5195">https://www.rndsystems.com/products/mouse-il-34-antibody_af5195</a>                                                                                                                                                                                     |
| IL-33 Antibody | ThermoFisher              | PA5-47007   | Neutralizing            |  | <a href="https://www.thermofisher.com/antibody/product/IL-33-Antibody-Polyclonal/PA5-47007">https://www.thermofisher.com/antibody/product/IL-33-Antibody-Polyclonal/PA5-47007</a>                                                                                                                                                 |
| IL-10 Antibody | ThermoFisher              | 16-7102-85  | Neutralizing            |  | <a href="https://www.thermofisher.com/antibody/product/IL-10-Antibody-clone-JES5-2A5-Monoclonal/16-7102-85">https://www.thermofisher.com/antibody/product/IL-10-Antibody-clone-JES5-2A5-Monoclonal/16-7102-85</a>                                                                                                                 |
| CD25           | Absolute antibody         | Ab00552-1.1 | Neutrophilizing         |  | <a href="https://absoluteantibody.com/product/anti-cd25-ox-39/">https://absoluteantibody.com/product/anti-cd25-ox-39/</a>                                                                                                                                                                                                         |

### DNA/cDNA Clones

| Clone Name | Sequence | Source / Repository | Persistent ID / URL |
|------------|----------|---------------------|---------------------|
|            |          |                     |                     |
|            |          |                     |                     |
|            |          |                     |                     |

### Cultured Cells

| Name                              | Vendor or Source | Sex (F, M, or unknown) | Persistent ID / URL                                                                               |
|-----------------------------------|------------------|------------------------|---------------------------------------------------------------------------------------------------|
| Human umbilical cord derived MSCs | ATCC             | unknown                | <a href="https://www.atcc.org/products/pcs-500-010">https://www.atcc.org/products/pcs-500-010</a> |

### Data & Code Availability

| Description | Source / Repository | Persistent ID / URL |
|-------------|---------------------|---------------------|
|-------------|---------------------|---------------------|

DOI [to be added]

|  |  |  |
|--|--|--|
|  |  |  |
|  |  |  |
|  |  |  |

## Other

| Description                               | Source / Repository         | Persistent ID / URL                                                                                                                                                                                                                                     |
|-------------------------------------------|-----------------------------|---------------------------------------------------------------------------------------------------------------------------------------------------------------------------------------------------------------------------------------------------------|
| DiD                                       | ThermoFisher, V22887        | <a href="https://www.thermofisher.com/order/catalog/product/V22887?SID=srch-hj-V22887">https://www.thermofisher.com/order/catalog/product/V22887?SID=srch-hj-V22887</a>                                                                                 |
| TRIzol reagent                            | Invitrogen, 15596026        | <a href="https://www.thermofisher.com/order/catalog/product/15596026?SID=srch-srp-15596026">https://www.thermofisher.com/order/catalog/product/15596026?SID=srch-srp-15596026</a>                                                                       |
| iScript cDNA Synthesis Kit                | Bio-Rad, 1708891            | <a href="https://www.bio-rad.com/en-us/sku/1708891-iscrypt-cdna-synthesis-kit-100-x-20-ul-rxns?ID=1708891">https://www.bio-rad.com/en-us/sku/1708891-iscrypt-cdna-synthesis-kit-100-x-20-ul-rxns?ID=1708891</a>                                         |
| SsoAdvanced Universal SYBR Green Supermix | Bio-Rad, 1725271            | <a href="https://www.bio-rad.com/en-us/SearchResults?search_api_fulltext=1725271">https://www.bio-rad.com/en-us/SearchResults?search_api_fulltext=1725271</a>                                                                                           |
| Rat cytokine array panel A                | R&D systems                 | <a href="https://www.rndsystems.com/search?keywords=Rat+cytokine+array+panel+A">https://www.rndsystems.com/search?keywords=Rat+cytokine+array+panel+A</a>                                                                                               |
| PMSF                                      | Thermofisher, Catalog#36978 | <a href="https://www.thermofisher.com/order/catalog/product/36978?SID=srch-srp-36978">https://www.thermofisher.com/order/catalog/product/36978?SID=srch-srp-36978</a>                                                                                   |
| enhanced chemiluminescence (ECL) kit      | Bio-Rad, catalog#1705061    | <a href="https://www.bio-rad.com/en-us/SearchResults?search_api_fulltext=1705061">https://www.bio-rad.com/en-us/SearchResults?search_api_fulltext=1705061</a>                                                                                           |
| Masson staining                           | Sigma, HT15-1KT             | <a href="https://www.sigmaaldrich.com/US/en/product/sigma/ht15">https://www.sigmaaldrich.com/US/en/product/sigma/ht15</a>                                                                                                                               |
| DAPI-containing Fluoromount-G             | Southern Biotech, 0100-20   | <a href="https://www.southernbiotech.com/dapi-fluoromount-gr-0100-20">https://www.southernbiotech.com/dapi-fluoromount-gr-0100-20</a>                                                                                                                   |
| TUNEL assay kit                           | Promega, G3250              | <a href="https://www.promega.com/products/cell-health-assays/apoptosis-assays/deadend-fluorometric-tunel-system/?catNum=G3250">https://www.promega.com/products/cell-health-assays/apoptosis-assays/deadend-fluorometric-tunel-system/?catNum=G3250</a> |

## ARRIVE GUIDELINES

The ARRIVE guidelines (<https://arriveguidelines.org/>) are a checklist of recommendations to improve the reporting of research involving animals. Key elements of the study design should be included below to better enable readers to scrutinize the research adequately, evaluate its methodological rigor, and reproduce the methods or findings.

### Study Design

| Groups                      | Sex | Age        | Number (prior to experiment) | Number (after termination) | Littermates (Yes/No) | Other description |
|-----------------------------|-----|------------|------------------------------|----------------------------|----------------------|-------------------|
| Group 1 (IPC-PBS)           | M   | 8-10 weeks | 6                            | 6                          | No                   |                   |
| Group 2 (IPC-PBS+IgG)       | M   | 8-10 weeks | 6                            | 6                          | No                   |                   |
| Group 3 (IPC-PBS+anti-CD25) | M   | 8-10 weeks | 6                            | 6                          | No                   |                   |
| Group 4 (IPC-Exo)           | M   | 8-10 weeks | 6                            | 6                          | No                   |                   |
| Group 5 (IPC-Exo+IgG)       | M   | 8-10 weeks | 6                            | 6                          | No                   |                   |
| Group 6 (IPC-Exo+anti-CD25) | M   | 8-10 weeks | 6                            | 6                          | No                   |                   |

**Sample Size:** Please explain how the sample size was decided Please provide details of any a *prior* sample size calculation, if done.

No statistical methods were used to predetermine the sample size. For all these experiments, 6 independent repeats/animals were deployed in each group, which allowed sufficient statistical analysis to generate p values to indicate the significance.

### Inclusion Criteria

After myocardial infarction modeling, the animals with an obvious pale color change to the apex of the heart were included for study.

### Exclusion Criteria

No data was excluded. Given the same age, a female rat has a much smaller left ventricular diameter and wall thickness. To increase the consistency of quantitative data that are directly related to these parameters, such as infarct area and scar thickness, we only used male rats in this study. We have added that no female rats were included is a limitation of the present study.

### Randomization

All samples were randomly assigned, and analyzed together in each experiment

### Blinding

Data acquisition and analysis were performed by investigators who are blinded to the groups

DOI [to be added]
