# Supplementary material
Source: PubMed Central journal article supplement (PMC9667926)

# Full unedited gel for Figure 2H

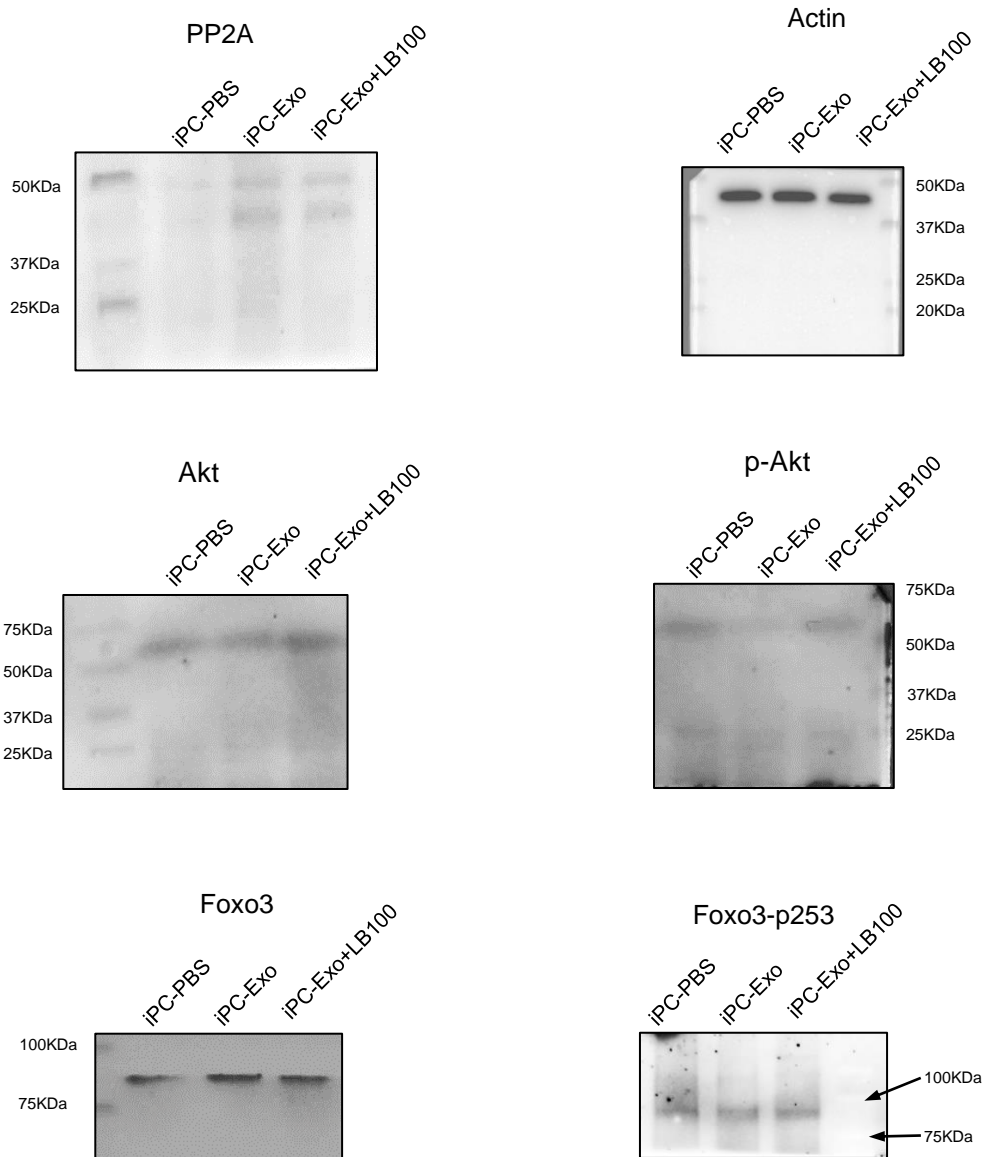

Supplement: NIHMS1840117-supplement-321384_Uncut_Gel_Blots.pdf [file NIHMS1840117-supplement-321384_Uncut_Gel_Blots.pdf]
